# Supplementary material for: Detection of Genome Donor Species of Neglected Tetraploid Crop Vigna reflexo-pilosa (Créole Bean), and Genetic Structure of Diploid Species Based on Newly Developed EST-SSR Markers from Azuki Bean (Vigna angularis)
Source: PLoS One. 2014 Aug 25;9(8):e104990. doi: 10.1371/journal.pone.0104990 (PMC4143246; doi:10.1371/journal.pone.0104990)
Supplement: Table S4 — Summary of SSRs in the non-redundant azuki bean ESTs and designed EST-SSR primers. (XLSX) [file pone.0104990.s004.xlsx]

## Sheet: Table S4
Table S4. Summary of SSRs in the non-redundant azuki bean ESTs and designed EST-SSR primers.
SSR motif	Number of SSRs in non-redundant ESTs	Frequency (%)	Number of SSRs in the regions between the designed EST-SSR primers.
			Mismatch 0	Mismatch 1	Mismatch 2	Sub total	Total
AG	322	27.1044	11	22	55	88
AT	520	43.771	15	5	15	35
AC	9	0.757576	3	3	8	14	137
AAG	86	7.23906	23	65	234	322
GGA	28	2.3569	7	39	149	195
ATC	38	3.19865	13	34	133	180
AGC	30	2.52525	13	35	120	168
GGT	34	2.86195	12	35	106	153
AAC	10	0.841751	8	31	103	142
GGC	12	1.0101	6	20	75	101
ACG	6	0.505051	5	11	40	56
AAT	68	5.72391	8	9	31	48
ACT	5	0.420875	2	3	30	35	1400
AAAG	3	0.252525	0	7	38	45
AAAT	6	0.505051	3	4	23	30
AAAC	0	0	0	2	18	20
GGGA	0	0	0	0	11	11
GGGT	0	0	0	1	5	6
AAGC	2	0.16835	1	1	4	6
GGAT	0	0	0	1	4	5
AATT	4	0.3367	1	0	4	5
AATG	0	0	0	2	2	4
Other tetra-nucleotide repeatsa)	5	0.420875	1	1	6	8	140
Total	1188		132	331	1214	1677	1677
a) Other tetra-nuckeotude repeats include AATC, AGGC, GAGC and GGCT.
